# Supplementary material for: Variation in the sacroiliac joint in Felidae
Source: PeerJ. 2021 May 11;9:e11116. doi: 10.7717/peerj.11116 (PMC8121069; doi:10.7717/peerj.11116)
Supplement: Supplemental Information 1 [file peerj-09-11116-s001.xlsx]

## Sheet: Feuil1
Species	Collection number	Sexe	Interiliac angle value (°)	DIT (cm)
Acinonyx jubatus	MNHN-ZM-1998-1942	U	30.6	10.98
Acinonyx jubatus	MNHN-ZM-AC-1932-442	F	27.5	14.32
Acinonyx jubatus	MNHN-ZM-1901-541	U	23	14.41
Acinonyx jubatus	MNHN-ZM-AC-1935-444	F	35.4	12.47
Acinonyx jubatus	MNHN-ZM-2009-244	U	26.7	13.81
Acinonyx jubatus	MNHN-ZM-AC-1894-582	F	19.6	11.97
Acinonyx jubatus	MNHN-ZM-1998-1981	M	33.6	11.99
Felis silvestris	MNHN-ZM-MO-1996-2171	U	48.9	4.77
Felis silvestris	MNHN-ZM-1961-189	U	33.2	2.8
Leopardus wiedii	MNHN-ZM-1984-041	U	51.6	6.49
Leptailurus serval	MNHN-ZM-1963-75	U	44.8	6.72
Lynx canadensis	MNHN-ZM-MO-1976-332	F	36.6	6.34
Lynx canadensis	MNHN-ZM-1961-248	U	49.1	5.54
Lynx rufus	MNHN-ZM-2012-1024	U	42.1	5.93
Lynx rufus	MNHN-ZM-1895-50	U	42.1	4.73
Neofelis nebulosa	MNHN-ZM-1980-16	F	46.5	7.06
Panthera leo	MNHN-ZM-1938-632	U	46.2	15.38
Panthera leo	MNHN-ZM-AC-1944-59	F	30.5	13.26
Panthera leo	MNHN-ZM-2005-01	U	33.7	17.76
Panthera leo	MNHN-ZM-AC-1995-164	U	29.5	15.14
Panthera leo	MNHN-ZM-1909-389	U	36.5	14.31
Panthera leo	MNHN-ZM-1912-491	U	42.3	12.83
Panthera leo	MNHN-ZM-1918-24	U	36.6	12.6
Panthera leo	MNHN-ZM-A7912	U	39.5	15.42
Panthera leo	MNHN-ZM-1862-54	U	39.6	15.15
Panthera leo	MNHN-ZM-AC-1913-110	U	37.9	15.27
Panthera leo	MNHN-ZM-AC-1926-282	M	35.7	14.83
Panthera leo	MNHN-ZM-AC-1912-398	M	30.7	10.99
Panthera leo	MNHN-ZM-1876-735	U	27.6	14.5
Panthera onca	MNHN-ZM-A1871	U	23.1	14.59
Panthera onca	MNHN-ZM-A7914	M	35.5	12.48
Panthera onca	MNHN-ZM-A7915	M	26.8	13.82
Panthera onca	MNHN-ZM-2006-641	F	19.7	11.101
Panthera onca	MNHN-ZM-1979-52	F	33.7	11.103
Panthera pardus	MNHN-ZM-A7932	U	48.1	4.78
Panthera pardus	MNHN-ZM-MO-1998-582	M	33.3	2.81
Panthera pardus	MNHN-ZM-1981-1245	U	51.7	6.49
Panthera pardus	MNHN-ZM-1849-409	U	44.9	6.72
Panthera pardus	MNHN-ZM-1889-71	U	36.7	6.34
Panthera pardus	MNHN-ZM-1949-10	U	49.2	5.132
Panthera pardus	MNHN-ZM-AC-1937-385	U	42.1	5.171
Panthera pardus	MNHN-ZM-1917-11	U	42.1	4.74
Panthera pardus	MNHN-ZM-1844-163	M	46.1	7.07
Panthera pardus	MNHN-ZM-1909-304	M	38.2	8.49
Panthera pardus	MNHN-ZM-1910-72	M	33.2	8.79
Panthera pardus	MNHN-ZM-A13048	F	39.8	8.01
Panthera pardus	MNHN-ZM-1945-70	F	31	7.46
Panthera tigris	MNHN-ZM-1903-137	U	18.8	12.65
Panthera tigris	MNHN-ZM-1889-407	U	31.4	12.12
Panthera tigris	MNHN-ZM-1906-33	U	30.3	12.5
Panthera tigris	MNHN-ZM-1898-35	U	27.6	12.71
Panthera tigris	MNHN-ZM-AC-1895-355	F	32.3	10.4
Panthera tigris	MNHN-ZM-1875-763	U	32.3	13.02
Panthera tigris	MNHN-ZM-1940-758	U	20.4	13.97
Panthera tigris	MNHN-ZM-1974-104	U	43.9	13.6
Panthera tigris	MNHN-ZM-1887-457	U	31.7	10.61
Panthera tigris	MNHN-ZM-2007-1556	U	30	12.48
Panthera uncia	MNHN-ZM-1998-1248	U	36.5	9.05
Panthera uncia	MNHN-ZM-1970-102	M	25.4	9.32
